# Supplementary material for: Die Borderline-Persönlichkeitsstörung
Source: Springer Nature journal article supplement (doi:10.1007/s41906-021-0987-9), 2021-02-19
Supplement: MOESM1 [file 18865820]

## Literatur

### zum Beitrag „Die Borderline-Persönlichkeitsstörung“ von Karsten Giertz

*PflegeZeitschrift* (74) 03/2021, S. 33-35

American Psychiatric Association (2013) *Diagnostic and Statistical Manual of Mental Disorders, Fifth Edition*. Washington DC, American Psychiatric Association. Deutsche Überarbeitung: Falkai P, Wittchen HU, Döpfner M, Gaebel W, Maier W, Rief, W, Saß, H & Zaudig M (Hrsg.) (2015) *Diagnostisches und Statistisches Manual Psychischer Störungen DSM-5*. Göttingen, Hogrefe Verlag.

Borkum DB, Frankenburg FR, Fitzmaurice GM, Athanasiadi A, Temes CM, Reich DB & Zanarini MC (2019) Predictors of slower time-to-cessation of individual therapy for Borderline Personality Disorder over 16 Years of prospective follow-up. In: *Journal of Personality Disorders*, 33 (1), pp. 135-144.

Dammann G (2007) Für eine „Neue Sozialpsychiatrie“: Aktuelle Brennpunkte und Entwicklungslinien der psychiatrischen Versorgung im Spannungsfeld von integrativen und gesundheitsökonomischen Perspektiven. In: *Fortschritte der Neurologie Psychiatrie*, 75 (10), S. 593-605.

Ellison WD, Rosenstein L, Morgan TA & Zimmermann M (2018) Community and clinical epidemiology of borderline personality disorder. In: *Psychiatric Clinics of North America*, 41 (4), pp. 561-573.

Fiedler P (2018) Epidemiologie und Verlauf von Persönlichkeitsstörungen. In: *Zeitschrift für Psychiatrie, Psychologie und Psychotherapie*, 66 (2), S. 85-94.

Frankenburg FR & Zanarini MC (2004) The Association Between Borderline Personality Disorder and Chronic Medical Illness, Poor Health-Related Lifestyle Choices, and Costly Forms of Health Care Utilization. In: *Journal of Clinical Psychiatry*, 65 (12), pp. 1660-1665.

Gahleitner SB, Giertz K & Taube V (2020) Bindung, Beziehung und Einbettung in der globalisierten Gesellschaft ermöglichen: Mikroprozesse professioneller Vertrauens- und Beziehungsarbeit mit vulnerablen Adoleszenten. In: Steckelberg C & Thiessen B (Hrsg.), *Wandel der Arbeitsgesellschaft: Soziale Arbeit in Zeiten von Globalisierung, Digitalisierung und Prekarisierung* (S. 95-109). Opladen, Berlin, Toronto, Verlag Barbara Budrich.

Grabe HJ & Giertz K (2020) Die Borderline-Persönlichkeitsstörung in den psychosozialen, psychotherapeutischen und psychiatrischen Versorgungssystemen von Deutschland. In: *Psychotherapie Forum*, 24, S. 100-107.

Grant BF, Chou SP, Goldstein RB, Huang B, Stinson FS, Saha TD, Smith SM, Dawson D A, Pulay AJ, Pickering RP & Ruan WJ (2008) Prevalence, Correlates, Disability, and Comorbidity of DSM-IV Borderline Personality Disorder: Results From the Wave 2 National Epidemiologic Survey on Alcohol and Related Conditions. In: *Journal of Clinical Psychiatry*, 69 (4), pp. 533-545.

Heath LM, Paris J, Laporte L & Gill KJ (2018) High Prevalence Of Physical Pain Among Treatment-Seeking Individuals With Borderline Personality Disorder. In: *Journal of Personality Disorders*, 32 (3), pp. 414-420.

Iliakis EA, Sonley AKI, Ilagan GS & Choi-Kain KW (2019) Treatment of borderline personality disorder: is supply adequate to meet public health needs? In: *Psychiatric Services*, 79 (9), pp. 772-779.

Melchinger H (2009) Vertragsärztliche Versorgung psychisch Kranker: Ungleiche Chancen für Patienten. In: *Zeitschrift für Allgemeinmedizin*, 85 (6), S. 247-253.

Paris J (2020) *Treatment of borderline personality disorder: a guide to evidence-based practice* (2. Ed.). New York & London, The Guilford Press.

Pérez S, Marco JH & García-Alandete J (2014) Comparison of clinical and demographic characteristics among borderline personality disorder patients with and without suicidal attempts and non-suicidal self-injury behaviors. In: *Psychiatric Research*, 220, pp. 935-940.

Soloff PH & Chiappetta L (2017) Suicidal behavior and psychosocial outcome in borderline personality disorder at 8-year follow-up. In: *Journal of Personality Disorders*, 31 (6), pp. 774-789.

Soloff PH & Chiappetta L (2019) 10-year outcome of suicidal behavior in borderline personality disorder. In: *Journal of Personality Disorders*, 33 (1), pp. 82-100.

Samuels J, Eaton WW, Bienvenu III OJ, Brown CH, Costa PT & Nestadt G (2002) Prevalence and correlates of personality disorders in a community sample. In: *The British Journal of Psychiatry*, 180, pp. 536-542.

Steinhart I (2018) Gesundheit, Komorbidität und medizinische Versorgung aus Sicht von Klientinnen und Klienten der Eingliederungshilfe. In: *Sozialpsychiatrische Informationen*, 48 (4), S. 20-24.

Teismann T, Koban C, Illes F & Oermann A (2016) *Psychotherapie suizidaler Patienten. Therapeutischer Umgang mit Suizidgedanken, Suizidversuchen und Suiziden*. Göttingen, Hogrefe Verlag.

Zanarini MC, Frankenburg FC, Reich DB & Fitzmaurice G (2012) Attainment and stability of sustained symptomatic remission and recovery among patients with borderline personality disorder and axis II comparison subjects: a 16-year prospective follow-up study. In: *American Journal of Psychiatry*, 169 (5), 476-483.
